1

2

3

4

5

6

7

## **Natural chromatin is heterogeneous and self associates *in vitro***

8

9

10

Shujun Cai, Yajiao Song, Chen Chen, Jian Shi and Lu Gan\*

11

12

13

Department of Biological Sciences and Centre for Bioluminescence Sciences, National

14

University of Singapore, Singapore 117543

15

\* Correspondence: [lu@anaphase.org](mailto:lu@anaphase.org)

16 **ABSTRACT**

17           The 30-nm fiber is commonly found in oligonucleosome arrays *in vitro* but rarely  
18 found in chromatin within nuclei. To determine how chromatin high-order structure is  
19 controlled, we used cryo-ET to study the undigested natural chromatin released from  
20 cells that do not have evidence of 30-nm fibers *in vivo*: picoplankton and yeast. In the  
21 presence of divalent cations, most of the chromatin from both organisms is compacted  
22 into a large mass. Rare irregular 30-nm fibers do form at the periphery of this mass,  
23 some of which include face-to-face interactions. In the absence of divalent cations,  
24 picoplankton chromatin decondenses into open zigzags. By contrast, yeast chromatin  
25 mostly remains compact with looser nucleosome packing, even after treatment with  
26 histone-deacetylase inhibitor. The 3-D configuration of natural chromatin is therefore  
27 sensitive to the local environment, but generally nonpermissive of regular motifs, even  
28 at the level of oligonucleosomes.

## 29 INTRODUCTION

30 In eukaryotic cells, chromatin is important in nuclear processes like transcription  
31 and replication. Chromatin structure is dictated by the 3-D relationship between  
32 nucleosomes (~ 146 bp of DNA wrapped around 8 histones). Chromatin can adopt open  
33 or compact higher-order structures, influenced by factors like histone post-translational  
34 modifications and interactions with chromatin “architectural” proteins (Jenuwein and  
35 Allis, 2001; McBryant et al., 2006). Chromatin higher-order structure in turn controls the  
36 accessibility to the DNA for both transcription and replication (Collins et al., 2002; Tse et  
37 al., 1998).

38 Chromatin structure has been studied extensively at nucleosome level.  
39 Nucleosomes connected by linker DNA are described as “beads-on-a-string” (Olins and  
40 Olins, 1974). The beads-on-a-string is hypothesized to be compacted into a helical  
41 nucleosome arrangement called the “30-nm fiber”, which is proposed to be either a one-  
42 start helix or two-start zigzag (Finch and Klug, 1976; Woodcock et al., 1984). However,  
43 more than one form of nucleosome packing might also coexist in the same 30-nm fiber  
44 (Grigoryev et al., 2009).

45 The diversity of chromatin structures has lead to inconsistent terminology. For  
46 the sake of clarity, we define a chromatin “mass” as a compact body with irregularly  
47 packed chromatin; a “regular 30-nm fiber” as an ordered compact structure  
48 approximately 30-nm wide; an “irregular 30-nm fiber” as a fiber-like structure with few  
49 repeated nucleosome motifs and of variable width; an “open zigzag” as a more  
50 extended structure with resolvable linker DNA and few nucleosome-nucleosome

51 interactions; and the beads-on-a-string as a chain of nucleosomes in which the angle  
52 between the entering and exiting linker DNA is nearly 180° (Fig. 1A).

53 Most of our knowledge of chromatin structure comes from studies of dilute  
54 solutions of short nucleosomes chains. These studies have systematically tested the  
55 effects of fixation with glutaraldehyde (Athey et al., 1990), recombinant histones (Luger  
56 et al., 1997b), linker histones (Routh et al., 2008), artificially selected “Widom 601”  
57 sequences that have a high affinity for histones (Dorigo et al., 2004), and ionic  
58 conditions (Dorigo et al., 2003; Huynh et al., 2005). Under special conditions, such  
59 chromatin constructs can form highly regular 30-nm fibers that can be studied at high  
60 resolution (Song et al., 2014).

61 Chromatin structure has also been studied *in situ* in a life-like frozen-hydrated  
62 state, either in 2-D by cryo-EM projection imaging or in 3-D by electron cryotomography  
63 (cryo-ET). These studies are much rarer because it is challenging to thin and then  
64 image the cells at cryogenic temperatures. Three groups found no evidence of regular  
65 30-nm fibers in mammalian cells (McDowall et al., 1986; Eltsov et al., 2008; Eltsov et  
66 al., 2014). We found that in the single-celled organisms *Ostreococcus tauri* (a  
67 eukaryotic picoplankton; herein called picoplankton) and *Saccharomyces cerevisiae* (a  
68 budding yeast; herein called yeast), there was also no evidence of regular 30-nm fibers  
69 (Gan et al., 2013; Chen et al., 2016). In contrast, cryo-EM studies have detected regular  
70 30-nm fibers in the isolated nuclei of both starfish sperm (Woodcock, 1994) and chicken  
71 erythrocytes (Scheffer et al., 2011). These and other studies challenge whether 30-nm  
72 fibers is the best model of chromatin within somatic cells (Hansen, 2012; Nishino et al.,  
73 2012; van Holde and Zlatanova, 1995).

74           The different conclusions between *in vitro* and *in vivo* chromatin studies raise the  
75 question: can the chromatin of cells that do not show evidence of 30-nm fibers *in vivo*  
76 be made to adopt a 30-nm-fiber structure *in vitro*? To address this question, we used  
77 cryo-ET to study the 3-D organization of undigested natural chromatin from  
78 picoplankton and yeast. In the presence of even traces of divalent cations, most of the  
79 chromatin in both organisms compacts into large masses. Some of the chromatin does  
80 form 30-nm fibers, predominantly of the irregular variety. In the absence of divalent  
81 cations, picoplankton chromatin decondenses into open zigzags, but yeast chromatin  
82 remains either in a mass or folded as irregular 30-nm fibers. To better understand how  
83 these nucleosomes interact, we classified the chromatin in both 2-D and 3-D, and found  
84 that there is no dominant higher-order packing motif, but the orientation of the DNA at  
85 the core-particle entry/exit points is not too variable. Therefore, the higher-order  
86 structure of natural chromatin is sensitive to environmental conditions, but this  
87 sensitivity varies by species.

## 88 **RESULTS**

89

### 90 **Release of natural picoplankton chromatin**

91 To study the higher-order structure of natural picoplankton chromatin *in vitro*, we  
92 lysed cells in hypotonic buffer on ice either with or without divalent cations (Fig. 1B).  
93 This treatment released all cellular contents, including the chromatin, and is expected to  
94 produce thinner plunge-frozen samples that generate higher-contrast cryotomograms.  
95 Compared to intact cells (Fig. 1C), the lysed cells' contents spread over a much larger  
96 area and indeed allowed the ice to be thinner, resulting in higher-contrast tomograms  
97 (Fig. 1D). The majority of the densities came from remnants of the two largest  
98 organelles -- the nucleus and the chloroplast. To keep the chromatin as intact as  
99 possible, we did not perform any isolation procedures or nuclease digestion.

100

### 101 **Picoplankton chromatin forms masses and irregular 30-nm fibers only in the** 102 **presence of divalent cations**

103 Previous studies have shown that short nucleosome arrays are sensitive to  
104 divalent cation concentration (Bednar et al., 1998). To test if divalent cations can induce  
105 30-nm-fibers in undigested picoplankton chromatin, we lysed and imaged picoplankton  
106 in the presence of 1 mM Mg<sup>2+</sup>. Most of the chromatin in these conditions was  
107 compacted into a large thick mass, but a small portion of the chromatin did form  
108 irregular 30-nm fibers (Figs. 2A and S1). The contrast was too low, however, to reveal  
109 more details. To determine how much the compaction and 30-nm fibers depended on  
110 Mg<sup>2+</sup>, we lysed cells without additional divalent cations (Fig. 2B). Under this condition,

111 most of the chromatin still remained associated as a large compact mass, but with more  
112 short irregular 30-nm fibers visible (Figs. 2E,F and S2). As a consequence of the ice  
113 thickness and dense nucleosome packing, the contrast was still too low to permit the  
114 unambiguous visualization of individual nucleosomes in most tomograms. In rare  
115 examples, we found some small clusters of nucleosomes packed in regular face-to-face  
116 interactions (Figs. S2G-J).

117 To determine if picoplankton chromatin masses and irregular 30-nm fibers  
118 depend on divalent cations, we chelated the residual divalent cations by lysing cells in  
119 the presence of 5 mM Ethylenediaminetetraacetic Acid (EDTA) (Fig. 2C, S3). The EDTA  
120 treatment was effective because ribosomes, which require magnesium for stability, were  
121 absent (Chao, 1957). In picoplankton samples treated this way, we did not find any  
122 evidence of 30-nm fibers or chromatin masses. Instead, all of the chromatin was  
123 decondensed into an open zigzag-like motif with individual nucleosomes and naked  
124 DNA visible (Fig. 2G). This large-scale change of chromatin higher-order structure  
125 demonstrates that picoplankton chromatin higher-order structure is very sensitive to  
126 divalent cation concentration.

127

### 128 **Yeast chromatin packing is less sensitive to divalent cations than picoplankton**

129 Picoplankton and yeast chromatin do not show evidence of 30-nm fibers *in vivo* (  
130 Gan et al., 2013; Chen et al., 2016). To test whether the chromatin higher-order  
131 structure of these two organisms is conserved *in vitro*, we imaged yeast chromatin in  
132 cell lysate. Yeast chromatin was more difficult to locate in these samples because there  
133 was no chromatin-proximal high-contrast structure like the chloroplast. To overcome this

134 problem, we first isolated and then lysed the nuclei in hypotonic buffer without additional  
135 divalent cations (Fig. S4). This strategy made it straightforward to locate the chromatin  
136 because it was now the most abundant material on the grid.

137 Like in picoplankton, the majority of yeast chromatin was compacted in a thick  
138 mass (Figs. 3A). This chromatin mass had low contrast, which prevented us from  
139 visualizing individual nucleosomes. In rare cases, we saw 30-nm fibers at the periphery  
140 of the chromatin mass (Fig. 3A). In total, we observed only seven irregular 30-nm fibers  
141 in eleven tomograms. These observations show that in the presence of trace amounts  
142 of free magnesium, yeast chromatin compacts *in vitro* and can occasionally form  
143 irregular 30-nm fibers.

144 To test if the yeast chromatin organization depends on residual divalent cations,  
145 we lysed nuclei in the presence of EDTA. In the 5 mM EDTA-treated sample, we were  
146 unable to distinguish most nucleosomes because the chromatin was not dispersed  
147 enough (Fig. S5A,C,D). Intact ribosomes could still be found, indicating that trace  
148 amounts of divalent cations were still present (Fig. S5A and C). We therefore increased  
149 the lysis-buffer EDTA concentration to 50 mM. This new condition was more effective  
150 because we could not find any 80S ribosomes (Fig. S5B and E). In the presence of 50  
151 mM EDTA, the chromatin mass became more dispersed (Fig. S6), and unlike in the  
152 conditions with less EDTA, chromatin fibers thicker than 50 nm were no longer  
153 detectable (Fig. S6). Unlike in picoplankton, in the absence of divalent cations, yeast  
154 nucleosomes remained closely packed and were not found to adopt the open zigzags  
155 with visible linker DNA (Fig. 3B, more examples in Fig. S5E and F). In summary, natural



156 yeast chromatin can compact into a large mass and form irregular 30-nm fibers even in  
157 the absence of divalent cations.

158

### 159 **Histone deacetylation facilitates yeast chromatin compaction**

160 In an early study (Lowary and Widom, 1989), yeast chromatin fragments in low  
161 salt formed extended “10-nm filaments”. We did not observe such structures. While the  
162 conditions in that study were different from ours (traditional EM vs. cryo-EM; digested  
163 vs. undigested chromatin), we sought another explanation for the differences observed.  
164 It is known that yeast chromatin is susceptible to deacetylation when cells are disrupted  
165 (Waterborg, 2000). To test whether the histone acetylation levels in yeast chromatin *in*  
166 *vitro* were too low to support a more disperse structure like the open zigzag, we treated  
167 the intact cells with Trichostatin A (TSA), a histone-deacetylase inhibitor (Bernstein et  
168 al., 2000). We then lysed the cells in hypotonic buffer containing both EDTA and TSA.  
169 We found that chromatin isolated this way was indeed more disperse (Figs. 4A and B,  
170 more examples in Fig. S7). In rare cases, we found open-zigzags (Figs. 4C and D), but  
171 we still did not find any structures that resembled a 10-nm filament. These results are  
172 nevertheless consistent with a recent study that showed that histone acetylation makes  
173 chromatin more deformable (Shimamoto et al., 2017).

174 To analyze the nucleosome packing more quantitatively, we performed template  
175 matching and then analysed both the nearest-neighboring distance (NND) and 10<sup>th</sup>  
176 NND distributions. The NND reports on short-range compaction whereas the 10<sup>th</sup> NND  
177 reports on long-range compaction, e.g., inter-fiber interactions (Fig. S8). As a reference,  
178 we also performed this analysis for nucleosome-like densities *in vivo* (Chen et al.,

179 2016). The NND distribution plots of chromatin *in vivo* and both with and without TSA  
180 treatment were almost indistinguishable (Fig. 4H). Note, however, that template  
181 matching *in vivo* produces more false positives due to lower contrast and the presence  
182 of more non-nucleosomal macromolecular complexes. These extra false positives make  
183 the *in vivo* NND values lower than they really are. Therefore, nucleosomes are very  
184 likely to be packed more loosely *in vivo*. In contrast, the 10<sup>th</sup> NND distribution of TSA-  
185 treated chromatin was longer than chromatin *in vivo*, which was itself longer than  
186 untreated chromatin *in vitro* (Fig. 4I). Our NND analysis is consistent with chromatin's  
187 appearance: histone acetylation does not severely perturb short-range interactions, but  
188 does affect long-range interactions between groups of nucleosomes.

189 In the chromatin of TSA-treated yeast, we observed a few stretches of naked  
190 DNA between nucleosomes (Fig. 4B,E,F). Nucleosome-free regions are a form of non-  
191 nucleosome-associated DNA that are usually longer than one nucleosome's worth of  
192 DNA (Lee et al., 2007; Mavrich et al., 2008; Shivaswamy et al., 2008; Yuan et al.,  
193 2005). To test if the long stretches of naked DNA could be nucleosome-free regions, we  
194 measured their lengths. We found that most of the naked DNA is between 50 nm and  
195 100 nm long, which is compatible with the absence of one or two nucleosome core  
196 particles (each 50 nm long) (Fig. 4G). Our data would also be consistent with the notion  
197 that this naked DNA was wrapped around a 'fragile' nucleosome or pre-nucleosome *in*  
198 *vivo*, but then lost their histones during nuclear lysis (Fei et al., 2015; Kubik et al., 2015).  
199 On some of the naked DNA strands, we found densities that are smaller than a  
200 nucleosome (Fig. 4E). We speculate that these densities might be chromatin-  
201 associating protein complexes such as transcription factors, chromatin remodelers, or

202 their subunits or subnucleosomal particles. Taken together, our *in vitro* DNA-length  
203 measurements are consistent with nucleosome-mapping studies.

204

### 205 **Natural chromatin has few ordered positions**

206 The crystal structure of a tetranucleosome and the cryo-EM structures of 30-nm  
207 fibers both have zigzag motifs with face-to-face nucleosome packing (Schalch et al.,  
208 2005; Song et al., 2014). In yeast chromatin, we found that only a few nucleosomes  
209 were packed face-to-face (Fig. 5A) or in a zigzag motif (Fig. 5B). To detect more regular  
210 packing motifs, we performed 2-D classification on subtomograms that contained  
211 multiple nucleosomes (Fig. 5C). In agreement with our visual inspection, only one class  
212 showed face-to-face packing and furthermore, there was no dominant motif (Fig. 5C).

213 Artificial nucleosome arrays with a 167-bp repeat (identical to the yeast  
214 nucleosome repeat length) are organized as compact 30-nm fibers (Routh et al., 2008).  
215 To test if natural yeast chromatin fibers (Fig. 5D) are as compact as these artificial 30-  
216 nm fibers, we determined the number of nucleosomes per 11 nm in the best-resolved  
217 fibers (Fig. 5E). Compared to the artificial fibers, most natural fibers are less compact (  
218 ~1.5 vs 6.1 nucleosomes per 11 nm) and have a broader distribution of diameters (15 to  
219 45 nm vs. 15 to 25nm, Fig. 5E) (Routh et al., 2008). The two best-resolved picoplankton  
220 30-nm fibers (Fig. S2G and H) were also loosely packed (3.3 and 2.4 nucleosomes / 11  
221 nm). Therefore, natural chromatin fibers are less compact but much more  
222 heterogeneous than artificial fibers.

223

### 224 **Natural chromatin is not very heterogeneous at the nucleosome level**

225           The complexity of natural chromatin could be explained if the nucleosomes are  
226 themselves conformationally heterogeneous. To test this hypothesis, we developed a  
227 subtomogram analysis workflow that takes advantage of recent advances in 2-D and 3-  
228 D image classification (Figs. 6, 7, S9) (Bharat and Scheres, 2016). This approach was  
229 able to resolve a few nucleosome conformers that differ in linker DNA orientation. For  
230 picoplankton, linker DNA conformation was variable, but the conformers generally fell  
231 into three classes (Figs. 6A, S10). In two classes, the linker DNA strands frequently  
232 entered and exited the nucleosome core in an “open” instead of “crossed” conformation  
233 (Fig. 6A, black and red arrows, respectively; Movie S1). In the third class, only one  
234 linker DNA was consistently in the same orientation, and therefore visible. While the 3-D  
235 classification in yeast nucleosomes showed higher-resolution features like the DNA  
236 gyres of nucleosomes, the linker DNA could not be visualized in most classes except for  
237 one class showing a DNA stem-like structure, which might be associated with linker  
238 histones (Fig. 7A). Taken together, our 3-D classification reveals that the conformation  
239 of nucleosomes is not very heterogeneous, except in the linker DNA.

240           Even though some of our tomograms reveal the locations of individual  
241 nucleosomes, the tomograms are still so crowded and complex that we may have  
242 missed some higher-order structures by visual inspection. To further test if the  
243 nucleosomes pack into higher-order structures, we remapped the class averages of  
244 template-matched nucleosomes into a phantom volume the same size of the original  
245 tomogram to make a “synthetic tomogram”. This approach is similar to the work done on  
246 polysomes and purified oligonucleosomes (Brandt et al., 2009; Scheffer et al., 2012).  
247 Most of the nucleosomes of open zigzags and an example chromatin fiber were

248 visualized in the synthetic tomograms, showing the robustness of our approach (Fig. 6B  
249 and C and 7B and C). In both picoplankton and yeast, the nucleosomes do not form  
250 long repeating motifs or regular structures of any kind (Fig. 6C and 7E). Furthermore,  
251 there were no nucleosome clusters or chains formed by the same conformational class.  
252 Therefore, natural chromatin is structurally heterogeneous at the oligonucleosome level.

## 253 **DISCUSSION**

254 Our previous cryo-ET studies of picoplankton and yeast challenged the notion  
255 that the 30-nm fiber explained most chromatin *in vivo* in unicellular eukaryotes. Here,  
256 we have tested how natural chromatin is organized *in vitro*, but using undigested natural  
257 chromatin instead of the chromatin fragments found in most *in vitro* studies. This natural  
258 chromatin condenses as fibers and masses at much lower divalent-cation  
259 concentrations than needed for chromatin fragments (Hansen, 2002; Maeshima et al.,  
260 2016). In the absence of divalent cations, picoplankton chromatin decondenses to an  
261 open zigzag configuration but yeast chromatin retains an irregular 30-nm fiber  
262 configuration. This discrepancy is highlighted in yeast chromatin, which, as discussed  
263 below, did not unfold as expected. These observations reveal that natural chromatin is  
264 both plastic and unpredictable.

265

### 266 **Picoplankton and yeast chromatin have different sensitivity to divalent cations**

267 Sequestration of divalent cations with EDTA is known to disrupt 30-nm-fiber  
268 formation and oligomerization (Widom, 1986). We found that the chromatin of both  
269 picoplankton and yeast is more disperse in the absence of divalent cations, but the level  
270 of dispersion is different. Picoplankton chromatin adopts an open zigzag configuration  
271 whereas the yeast chromatin is much more crowded, with a few irregular 30-nm fibers,  
272 even in 50 mM EDTA (Fig. 8). According to an early study (Lowary and Widom, 1989),  
273 the yeast chromatin should have become 10-nm filaments. We did not observe such  
274 structures, probably due to the sample differences, e.g., purified short yeast chromatin  
275 fragments vs. nuclear lysate. Natural picoplankton chromatin therefore follows the

276 divalent-cation-dependent compaction behavior seen in metazoans, whereas yeast  
277 chromatin does not.

278       What factors could explain the differences in the higher-order structure of  
279 picoplankton and yeast chromatin? First, the nucleosome-repeat length of picoplankton  
280 is ~ 30 bp longer than yeast (Thomas and Furber, 1976; Gan et al., 2013). The shorter  
281 yeast linker DNA brings nucleosomes closer together, increasing the chances of  
282 interaction between sequential nucleosomes. Second, picoplankton does not have a  
283 linker-histone homolog, but yeast does (Downs et al., 2003). Linker histones could keep  
284 yeast chromatin compact by, for example, restricting the angles between entering and  
285 exiting DNA, which would further disfavor an open zigzag conformation (Thoma and  
286 Koller, 1977; Bednar et al., 1998). Third, picoplankton linker DNA is enriched in  
287 methylation (Huff and Zilberman, 2014), which stiffens DNA (Nathan and Crothers,  
288 2002). This stiffer linker DNA may keep picoplankton nucleosomes apart as open  
289 zigzags in the absence of divalent cations. We hypothesize that linker DNA length and  
290 chemistry and the presence of linker histone jointly contribute to chromatin  
291 compactability.

292

### 293 **Nucleosomes of natural chromatin pack heterogeneously**

294       Linker DNA has variable length and enters and leaves the nucleosome core  
295 particle at variable angles (Yao et al., 1990; Bednar et al., 2017). In the context of  
296 undigested chromatin, we also detected linker DNA of differing orientations in the 3-D  
297 classes of picoplankton nucleosomes (Fig. 6A). Unlike the cryo-EM study on  
298 reconstituted nucleosome arrays (without linker histone) where most nucleosomes had

299 linker DNA in the “closed” conformation (Geiss et al., 2014), we find that picoplankton  
300 linker DNA adopts a more “open” conformation, possibly due to the enhanced stiffness  
301 of picoplankton linker DNA (see above). In contrast, most 3-D classes of yeast  
302 nucleosomes did not show linker DNA, probably due to the crowded packing of  
303 nucleosomes that lowers its contrast. We nevertheless saw a stem-like density in one  
304 class, similar to a recently published structure of the chromatosome (Bednar et al.,  
305 2017).

306         Beads-on-a-string motifs are characterized by the large  $\sim 180^\circ$  angle made by  
307 the linker DNA at the nucleosome entry and exit points (Fig. 1A, structure v). Repetition  
308 of this motif maximizes the distance between nucleosomes, resulting in maximum  
309 decondensation. These motifs have been routinely seen in dried chromatin that has  
310 been adhered to a carbon film (Olins and Olins, 1974; Grigoryev et al., 2009), but very  
311 rarely seen in frozen-hydrated chromatin (Bednar et al., 1998; Geiss et al., 2014). We  
312 very rarely saw beads-on-a-string in our picoplankton chromatin and did not see a  
313 single example in our yeast chromatin; we surmise that if yeast chromatin adapted the  
314 beads-on-a-string configuration, we would have observed a structure that could be  
315 called a 10-nm filament. These observations are consistent with the crystal structure of  
316 the mononucleosome (Luger et al., 1997), from which the linker DNA would emerge at  
317 an angle much less than  $180^\circ$  in the absence of large bending forces. Therefore, the  
318 most decondensed conformation that natural chromatin can adopt *in vitro* is an open  
319 zigzag.

320         Face-to-face nucleosome packing has been observed in oligonucleosome arrays  
321 (Robinson et al., 2006) and isolated starfish sperm chromatin (Scheffer et al., 2012).



322 Here we found that the face-to-face interactions exist in both picoplankton and yeast,  
323 but are rare. The face-to-face packing probably involves the well-known interaction  
324 between a positively charged histone tail on one nucleosome with the acidic patch on a  
325 neighbor (Luger et al., 1997a; Funke et al., 2016). The rarity of face-to-face packing in  
326 natural chromatin is at odds with the cryo-EM models of recombinant 30-nm fibers, in  
327 which every single nucleosome is involved in a face-to-face packing interaction (Song et  
328 al., 2014). In that study, the absence of histone marks, the glutaraldehyde fixation, and  
329 the periodic spacing between adjacent nucleosomes could have stabilized the face-to-  
330 face packing interaction, thereby explaining why the structures of reconstituted  
331 nucleosome arrays differ so much from natural chromatin.

332 An earlier study found that short nucleosome arrays with a yeast-like  
333 nucleosome-repeat length (167 bp) could form ordered, dispersed, 30-nm fibers *in vitro*  
334 (Routh et al., 2008). We did not observe such fibers. Instead, most yeast nucleosomes  
335 pack into a large mass without any regular motifs; in the few other cases, chromatin  
336 packs as irregular 30-nm fibers. The formation of chromatin masses can be explained  
337 by the interdigitation of fibers, i.e., inter-fiber interactions force the irregular 30-nm fibers  
338 to be in an unfolded state, mixed with the nucleosomes of other unfolded 30-nm fibers  
339 (Eltsov et al., 2008). These masses could also be explained by hierarchical loops, which  
340 are compatible with more heterogeneous packing than helical models (Grigoryev et al.,  
341 2016). More importantly, 30-nm fibers are found at the less-crowded periphery of  
342 chromatin mass *in vitro*. This phenomenon supports the idea that the chromatin  
343 crowding can prevent fiber formation. However, due to technical limitations, we cannot

344 exclude the possibility that the 30-nm fibers do not unfold, but are instead  
345 indistinguishable when closely packed (Grigoryev and Woodcock, 2012).

346

### 347 **Chromatin is more compact *in vitro* than *in vivo***

348 Our cryo-ET studies of two organisms gives us a rare opportunity to assess the  
349 factors that contribute differences in 3-D chromatin organization *in vivo* and *in vitro*. One  
350 major difference is that nucleosomes pack slightly closer *in vitro* than *in vivo*, especially  
351 in yeast (Fig. 4 H and I). Although our lysis approach is gentle, it cannot keep chromatin  
352 remodelers and transcription factors from dissociating from the chromatin. The  
353 presence of such factors *in vivo* might prevent the chromatin from folding into a compact  
354 higher-order structure. This notion was supported by a study showing that when the  
355 Widom 601 nucleosome-positioning element was inserted into yeast genome, both the  
356 positioning and the occupancy changed substantially compared to *in vitro* chromatin  
357 arrays (Perales et al., 2011). We hypothesize that chromatin remodelers, transcription  
358 factors, and transcription itself keep chromatin dispersed *in vivo*; the absence of these  
359 factors *in vitro* allows chromatin segments to pack closer together.

## 360 MATERIALS AND METHODS

361

### 362 Picoplankton cell culture

363 *Ostreococcus tauri* cells (strain OTH95, Roscoff Culture Collection strain RCC  
364 745) were grown in artificial seawater containing Sigma sea salt and Keller enrichment  
365 medium (Table S1) in a 12h:12h light:dark cycle. Lighting was provided by T5050 white  
366 light-emitting diodes, passed through a 'Moonlight blue' filter (Lee Filters, #183;  
367 Panavision, Los Angeles, CA). This setup produced an illuminance of ~ 400 - 500 lux  
368 when measured at the approximate position of the cells, with an Amprobe LM-100  
369 digital light meter (Danaher, Inc., Everett, WA). Cells (30 - 50 ml) grown this way were  
370 loosely synchronized and were mostly in mid-G<sub>1</sub> phase at the beginning of the light  
371 phase (Corellou et al., 2005). The cells were harvested in mid-log phase (OD<sub>600</sub> ~ 0.05 -  
372 0.1) shortly after the light-to-dark transition and then pelleted by centrifugation at 5,000  
373 × g for 10 minutes at 4°C.

374

### 375 Picoplankton lysis

376 Cells were then resuspended in 1 ml of prechilled (4°C) fresh artificial seawater  
377 and re-centrifuged at 5000 × g for 1 minute. The cell pellet was then resuspended in  
378 prechilled lysis buffer, yielding a final OD<sub>600</sub> ~ 20. The cells were incubated on ice for  
379 either 7 - 9 minutes (1 mM Mg<sup>2+</sup>) or 10 - 15 minutes (0 Mg<sup>2+</sup> or 5 mM EDTA), measured  
380 from when the cells were resuspended in lysis buffer to the point of plunge freezing.  
381 Using a combination of sucrose and glycerol, the concentration of soluble particles (ions  
382 and undissociated molecules) in the lysis buffer was adjusted to ~820 mM, which is

383 approximately 4/5 of the concentration of soluble buffer molecules in artificial seawater  
384 (~ 1 M); for details, see Table S2. The picoplankton burst in all lysis buffers. While the  
385 plasma membrane was completely ruptured, the contents of the largest two organelles -  
386 - the nucleus and the chloroplast -- remained physically associated. This association  
387 was fortuitous because the chloroplast remnants, which were high contrast and could  
388 be located even at low magnification, facilitated the search for the adjacent chromatin.  
389

### 390 **Yeast nucleus isolation and lysis**

391 Nuclei were isolated using the Yeast nuclei isolation kit (Abcam 206997), with  
392 modifications. Wild-type yeast (YEF473A; a gift from Kerry Bloom) cells were grown in  
393 30 ml yeast peptone dextrose (YPD) medium to mid-log phase ( $OD_{600} \sim 1$ ) in a shaker  
394 ( $30^{\circ}\text{C}$ , 250 RPM). The cells were pelleted by centrifuging at  $3,000 \times g$  for 5 minutes at  
395 room temperature in 50 ml conical tubes, washed twice by resuspension in 1 ml  $\text{H}_2\text{O}$ ,  
396 then re-centrifuged at  $3000 \times g$  for 1 min. The cell pellet was then resuspended in 1 ml  
397 Buffer A (containing 10 mM DTT, from the kit), and then incubated for 10 minutes in a  
398  $30^{\circ}\text{C}$  water bath. Cells were then centrifuged at  $1500 \times g$  for 5 minutes and then  
399 resuspended in 1 ml Buffer B (from the kit) containing lysis enzyme cocktail (diluted  
400 1:1,000). The mixture was incubated in a  $30^{\circ}\text{C}$  shaker for 15 min, and then centrifuged  
401 at  $1,500 \times g$  for 5 minutes at  $4^{\circ}\text{C}$ . The pellet was resuspended in 1 ml prechilled Buffer  
402 C (from the kit) with protease inhibitor cocktail. The suspension was transferred to a  
403 glass Dounce homogenizer on ice and then the cells were lysed with 15 strokes. The  
404 suspension was incubated with shaking for 30 minutes at room temperature and was  
405 then centrifuged at  $500 \times g$  for 5 minutes at  $4^{\circ}\text{C}$  to remove the debris. A small aliquot of

406 the supernatant was stained with 4',6-Diamidino-2-phenylindole dihydrochloride (DAPI)  
407 to verify that the isolated nuclei were abundant. The supernatant was then re-  
408 centrifuged at 20,000 × *g* for 10 minutes at 4°C. The nuclear pellet was resuspended in  
409 pre-chilled lysis buffer (see Table S2) and incubated for 15 minutes on ice prior to  
410 plunge freezing.

411

#### 412 **TSA treatment**

413 Wild-type yeast were grown in 30 ml YPD to mid-log phase ( $OD_{600} \sim 1$ ) in a  
414 shaker (30°C, 250 RPM). Cells were pelleted at 3,000 × *g* for 5 minutes and then  
415 resuspended in 30 ml YPD with 16.4 μM TSA (5 mM stock in dimethyl sulfoxide, Sigma  
416 T1952). The cells were then incubated for 1 hour at 30°C before nuclei isolation. During  
417 nuclei isolation, the solutions used up to the spheroplasting step did not contain TSA.  
418 After spheroplasting, all solutions contained 82 μM TSA.

419

#### 420 **Plunge-freezing**

421 Colloidal gold (used for fiducial-based tomographic image alignment; see below)  
422 has a tendency to aggregate in the presence of seawater unless first treated with bovine  
423 serum albumin (BSA) (Gan et al., 2011). Therefore, the colloidal gold (20 nm, BBI  
424 solutions, Cardiff, UK) was first suspended in 10 mg/ml BSA, pelleted at 18,000 × *g* for  
425 5 minutes, and then the supernatant was discarded. The gold was treated with BSA  
426 twice in this way. The BSA-treated gold was then added to the cells just before plunge-  
427 freezing.

428           Grids (CF-4/2-2C-T and CF-2/2-2C-T, Protochips, Morrisville, NC) were plasma  
429 cleaned 90 seconds at 15 mA with a Emitech K100X glow-discharge unit. Treated cells  
430 (3  $\mu$ l) were added to each side of a plasma-cleaned grid. The grids were blotted with  
431 filter paper (Whatman, Grade 1) for 1 second, blot force 1, followed by a 5-second wait  
432 time, then plunged into 67/33 (% v/v) liquid propane/ethane mixture (Tivol et al., 2008)  
433 using a Vitrobot, Mark IV (Thermo, Waltham, MA). The relative humidity in the sample  
434 chamber of the Vitrobot was kept at 100%. The grids were then stored in liquid nitrogen.

435

### 436 **Cryo-ET and image processing**

437           Data-collection parameters are detailed in Table S3. Tilt-series alignment and  
438 tomographic reconstruction were done using Etomo (Mastronarde, 1997). Because only  
439 the positions corresponding to the nuclear contents were of interest and because some  
440 sample positions warped during data collection, most tilt-series were aligned using only  
441 the gold fiducials in the vicinity of the nuclear densities. Some of the beads were  
442 automatically removed with the Etomo “bead eraser” tool. For yeast samples, all tilt  
443 series were aligned using patch tracking because of insufficient gold fiducial numbers.  
444 For yeast and picoplankton samples treated with 0 mM  $Mg^{2+}$  or with EDTA, the tilt series  
445 were first corrected for the effects of the contrast-transfer function and then 2-D low-  
446 pass filtered with cutoff in the range of 0.2 - 0.35  $\text{pixel}^{-1}$  and sigma value of 0.05  $\text{pixel}^{-1}$ ;  
447 these settings gently attenuated spatial-frequency components starting at 4.5-nm  
448 (picoplankton) to 2.6-nm (yeast) resolution. For picoplankton samples treated with 1 mM  
449  $Mg^{2+}$ , the contrast was much lower due to sample thickness and crowding effects,

450 necessitating the two-fold binning of the tilt series to improve the visualization. Other  
451 parameters were kept as Etomo defaults.

452

### 453 **Naked-DNA length analysis**

454 To facilitate the measurement of naked DNA length, the tomograms were binned  
455 by 2 and then low-pass filtered (cutoff=0.3, sigma=0.05). DNA in a tomogram was  
456 tracked semi-automatically using the Livewire drawing tool in 3dmod, saved as a model  
457 file, then extracted with the IMOD program imodinfo.

458

### 459 **Template matching**

460 Template matching was done using PEET (Heumann, 2016). Two types of  
461 templates were used for picoplankton: a featureless cylinder (6-nm thick, 10-nm  
462 diameter), generated using bediting (Heymann and Belnap, 2007); for yeast: a  
463 subtomogram of a high contrast nucleosome-like particle was selected. The choice of  
464 reference did not influence the subsequent analysis of most particles because a low  
465 cross-correlation (CC) cutoff was used (see below) and the rotational alignment solution  
466 was discarded prior to further analysis. For *O. tauri*, however, we found that hits  
467 corresponding to nucleosomes with the superhelical axis nearly perpendicular to the ice  
468 surface were off-center. These nucleosomes were better centered when we used a low-  
469 pass-filtered subtomogram average of a RELION 3-D class as a reference (see below).  
470 To minimize the effects of neighboring densities, subvolumes were isolated with a thick  
471 cylindrical mask with a soft edge. To minimize the number of false negatives, we kept  
472 the template-matching hits that were spaced as close as 6 nm, corresponding to face-

473 to-face packed nucleosomes. This minimum distance resulted in many “overlapped”  
474 candidate nucleosomes (hits), of which one was removed automatically at each position  
475 at the end of the search. To further minimize the number of false negatives, all hits with  
476 a CC (relative to the template) greater than 0.2 were saved and then visualized in the  
477 original tomogram; the CC values were displayed using the 3dmod “fine grain” feature.  
478 The CC cutoff was then manually increased in 0.05 increments until most spurious hits  
479 (carbon support edge, ice contaminants, and aggregates) were eliminated. The final  
480 filtered hit list was then subject to heterogeneity analysis using RELION (see below).

481

#### 482 **Nearest-neighbor distance analysis**

483 For a fair comparison between different datasets, we used the average of CC  
484 coefficients of all template-matching hits as cutoff. For example, if the average CC value  
485 in dataset A was 0.4 and the one in dataset B was 0.3, then we used 0.4 as cutoff for A  
486 and 0.3 for B. We then made small adjustments to the CC cutoff to ensure the low  
487 occurrence of obvious false positives (like ribosomes and ice) and false negatives. The  
488 coordinates of the nucleosome hits were then imported into Matlab. NND and 10<sup>th</sup> NND  
489 were calculated using the Matlab function nearestneighbour.m. The script is available  
490 upon request.

491

#### 492 **Heterogeneity analysis and subtomogram averaging**

493 Subtomograms were analyzed using the subtomogram-averaging and classification  
494 routines (Bharat et al., 2015; Bharat and Scheres, 2016) as implemented in RELION 1.4  
495 and 2.0 (Kimanius et al., 2016; Scheres, 2012a, b). Because CTF phase flipping was



496 already done in IMOD, we disabled phase flipping in RELION. We also disabled the  
497 dose-weightage scheme because the images in the second half of the tilt series were  
498 severely underweighted due to the large cumulative dose. The missing-wedge effects  
499 were compensated for by the RELION CTF model. Candidate nucleosome positions  
500 were imported into RELION. Owing to the crowdedness of yeast nucleosomes, we used  
501 a smaller box (24 nm) and a smaller mask (17-nm diameter) for classification to exclude  
502 most densities of adjacent nucleosomes. Each nucleosome was averaged along the  
503 tomographic Z axis to produce a pseudo projection. These projections were then  
504 subjected to 2-D classification (50 or 100 classes). “Junk particles” such as ice,  
505 contaminants, or carbon-support features were manually removed. If the identity of the  
506 class (“junk” vs. real nucleosome) was ambiguous, the member particle positions were  
507 visualized in the context of the original tomogram, allowing for discrimination of junk and  
508 real particles. Our decisions to exclude/include ambiguous classes were guided by  
509 biologically meaningful features such as the size and shape of the density and the  
510 proximity to the other nucleosomes (chromatin-associated nucleosomes are not found  
511 “floating” alone). The remaining good particles were subjected additional rounds of 2-D  
512 classification and elimination of junk classes until only reasonable nucleosome-like  
513 classes remained.

514 To better discriminate between nucleosome conformational states, we performed  
515 3-D classification without the use of an external reference. New junk classes were found  
516 and removed at the end of each round of classification. We found that the number of  
517 classes decreased as we increased the resolution used for classification to the Nyquist  
518 limit. This resolution dependency is probably due to the lower signal-to-noise ratio of the

519 higher-resolution data. Starting with 20 classes and using data to the Nyquist limit (20 Å  
520 for yeast), fewer than 10 distinctive conformational classes remained at the end of 2 - 3  
521 sequential classification-and-junk-removal rounds. These classes were then subjected  
522 to synthetic tomogram construction. For picoplankton chromatin in 1 mM and 0 mM  
523 Mg<sup>2+</sup>, we also attempted 3-D classification of higher-order structures by increasing the  
524 mask size, but found that most of the classes did not converge to anything biologically  
525 meaningful, probably due to the extreme heterogeneity at the level of oligo-nucleosome  
526 structures. Our 2-D classification of picoplankton chromatin in 5 mM EDTA failed to find  
527 any convincing face-to-face or other abundant higher-order motifs because most of the  
528 nucleosomes were too far apart to interact.

529

### 530 **Synthetic tomogram construction**

531 Template-matching hits that were subjected to the 2-D and 3-D classification  
532 process were mapped back into a phantom volume the size of the original tomogram  
533 using the EMAN2 program e2proc3d (Tang et al., 2007). The script to do this is  
534 available upon request.

535

### 536 **Figures**

537 Density maps were rendered with UCSF Chimera (Pettersen et al., 2004).

538

### 539 **Data sharing**

540 Tilt series data of all samples presented in this paper have been made  
541 accessible in the EMPIAR online database: (EMPIAR-10098). One example tomogram

542 each of picoplankton and yeast has been deposited in the EMDB (EMD-6737).

543

## 544 **Acknowledgements**

545 We thank the CBIS microscopy staff for support and training. We thank François-  
546 Yves Bouget for advice of *Ostreococcus* cell-culture conditions, Rado Danev for  
547 suggesting 2-D classification of subtomograms, and Kerry Bloom for yeast strains. We  
548 also thank the Gan team and David Shore for discussions. SC, YS, CC, and LG were  
549 supported by NUS startups R-154-000-515-133, R-154-000-524-651, and D-E12-303-  
550 154-217, a MOE T2 R-154-000-624-112, and a NUS YIA R-154-000-558-133.

551

## 552 **Contributions**

553 SC - experiments, project design, writing; YS - experiments; CC - experiments, editing;  
554 JS - training; LG - experiments, project design, writing.

555 **REFERENCES**

556

557 Athey, B.D., Smith, M.F., Rankert, D.A., Williams, S.P., and Langmore, J.P. (1990). The  
558 diameters of frozen-hydrated chromatin fibers increase with DNA linker length: evidence  
559 in support of variable diameter models for chromatin. *J Cell Biol* *111*, 795-806.

560 Bednar, J., Garcia-Saez, I., Boopathi, R., Cutter, A.R., Papai, G., Reymer, A., Syed,  
561 S.H., Lone, I.N., Tonchev, O., Crucifix, C., *et al.* (2017). Structure and Dynamics of a  
562 197 bp Nucleosome in Complex with Linker Histone H1. *Molecular cell* *66*, 384-397  
563 e388.

564 Bednar, J., Horowitz, R.A., Grigoryev, S.A., Carruthers, L.M., Hansen, J.C., Koster, A.J.,  
565 and Woodcock, C.L. (1998). Nucleosomes, linker DNA, and linker histone form a unique  
566 structural motif that directs the higher-order folding and compaction of chromatin. *Proc*  
567 *Natl Acad Sci U S A* *95*, 14173-14178.

568 Bernstein, B.E., Tong, J.K., and Schreiber, S.L. (2000). Genomewide studies of histone  
569 deacetylase function in yeast. *Proc Natl Acad Sci U S A* *97*, 13708-13713.

570 Bharat, T.A., Russo, C.J., Lowe, J., Passmore, L.A., and Scheres, S.H. (2015).  
571 Advances in Single-Particle Electron Cryomicroscopy Structure Determination applied  
572 to Sub-tomogram Averaging. *Structure* *23*, 1743-1753.

- 573 Bharat, T.A., and Scheres, S.H. (2016). Resolving macromolecular structures from  
574 electron cryo-tomography data using subtomogram averaging in RELION. *Nat Protoc*  
575 *11*, 2054-2065.
- 576 Brandt, F., Etchells, S.A., Ortiz, J.O., Elcock, A.H., Hartl, F.U., and Baumeister, W.  
577 (2009). The native 3D organization of bacterial polysomes. *Cell* *136*, 261-271.
- 578 Chao, F.C. (1957). Dissociation of macromolecular ribonucleoprotein of yeast. *Archives*  
579 *of biochemistry and biophysics* *70*, 426-431.
- 580 Chen, C., Lim, H.H., Shi, J., Tamura, S., Maeshima, K., Surana, U., and Gan, L. (2016).  
581 Budding yeast chromatin is dispersed in a crowded nucleoplasm in vivo. *Mol Biol Cell*  
582 *27*, 3357-3368.
- 583 Collins, N., Poot, R.A., Kukimoto, I., Garcia-Jimenez, C., Delleire, G., and Varga-Weisz,  
584 P.D. (2002). An ACF1-ISWI chromatin-remodeling complex is required for DNA  
585 replication through heterochromatin. *Nat Genet* *32*, 627-632.
- 586 Corellou, F., Camasses, A., Ligat, L., Peaucellier, G., and Bouget, F.Y. (2005). Atypical  
587 regulation of a green lineage-specific B-type cyclin-dependent kinase. *Plant physiology*  
588 *138*, 1627-1636.

- 589 Dorigo, B., Schalch, T., Bystricky, K., and Richmond, T.J. (2003). Chromatin fiber  
590 folding: requirement for the histone H4 N-terminal tail. *Journal of molecular biology* 327,  
591 85-96.
- 592 Dorigo, B., Schalch, T., Kulangara, A., Duda, S., Schroeder, R.R., and Richmond, T.J.  
593 (2004). Nucleosome arrays reveal the two-start organization of the chromatin fiber.  
594 *Science* 306, 1571-1573.
- 595 Downs, J.A., Kosmidou, E., Morgan, A., and Jackson, S.P. (2003). Suppression of  
596 homologous recombination by the *Saccharomyces cerevisiae* linker histone. *Molecular*  
597 *cell* 11, 1685-1692.
- 598 Eltsov, M., MacLellan, K.M., Maeshima, K., Frangakis, A.S., and Dubochet, J. (2008).  
599 Analysis of cryo-electron microscopy images does not support the existence of 30-nm  
600 chromatin fibers in mitotic chromosomes in situ. *Proceedings of the National Academy*  
601 *of Sciences* 105, 19732-19737.
- 602 Eltsov, M., Sosnovski, S., Olins, A.L., and Olins, D.E. (2014). ELCS in ice: cryo-electron  
603 microscopy of nuclear envelope-limited chromatin sheets. *Chromosoma* 123, 303-312.
- 604 Fei, J., Torigoe, S.E., Brown, C.R., Khuong, M.T., Kassavetis, G.A., Boeger, H., and  
605 Kadonaga, J.T. (2015). The prenucleosome, a stable conformational isomer of the  
606 nucleosome. *Genes Dev* 29, 2563-2575.

- 607 Finch, J.T., and Klug, A. (1976). Solenoidal model for superstructure in chromatin.  
608 Proceedings of the National Academy of Sciences 73, 1897-1901.
- 609 Funke, J.J., Ketterer, P., Lieleg, C., Korber, P., and Dietz, H. (2016). Exploring  
610 Nucleosome Unwrapping Using DNA Origami. Nano Lett 16, 7891-7898.
- 611 Gan, L., Ladinsky, M.S., and Jensen, G.J. (2011). Organization of the smallest  
612 eukaryotic spindle. Current biology : CB 21, 1578-1583.
- 613 Gan, L., Ladinsky, M.S., and Jensen, G.J. (2013). Chromatin in a marine picoeukaryote  
614 is a disordered assemblage of nucleosomes. Chromosoma 122, 377-386.
- 615 Geiss, C.P., Keramisanou, D., Sekulic, N., Scheffer, M.P., Black, B.E., and Frangakis,  
616 A.S. (2014). CENP-A arrays are more condensed than canonical arrays at low ionic  
617 strength. Biophysical journal 106, 875-882.
- 618 Grigoryev, S.A., Arya, G., Correll, S., Woodcock, C.L., and Schlick, T. (2009). Evidence  
619 for heteromorphic chromatin fibers from analysis of nucleosome interactions. Proc Natl  
620 Acad Sci U S A 106, 13317-13322.
- 621 Grigoryev, S.A., Bascom, G., Buckwalter, J.M., Schubert, M.B., Woodcock, C.L., and  
622 Schlick, T. (2016). Hierarchical looping of zigzag nucleosome chains in metaphase  
623 chromosomes. Proc Natl Acad Sci U S A 113, 1238-1243.

624 Grigoryev, S.A., and Woodcock, C.L. (2012). Chromatin organization - the 30 nm fiber.  
625 *Exp Cell Res* 318, 1448-1455.

626 Hansen, J.C. (2002). Conformational dynamics of the chromatin fiber in solution:  
627 determinants, mechanisms, and functions. *Annual review of biophysics and*  
628 *biomolecular structure* 31, 361-392.

629 Hansen, J.C. (2012). Human mitotic chromosome structure: what happened to the 30-  
630 nm fibre? *The EMBO journal* 31, 1621-1623.

631 Heumann, J.M. (2016). PEET (University of Colorado Boulder).

632 Heymann, J.B., and Belnap, D.M. (2007). Bsoft: image processing and molecular  
633 modeling for electron microscopy. *Journal of structural biology* 157, 3-18.

634 Huff, J.T., and Zilberman, D. (2014). Dnmt1-independent CG methylation contributes to  
635 nucleosome positioning in diverse eukaryotes. *Cell* 156, 1286-1297.

636 Huynh, V.A., Robinson, P.J., and Rhodes, D. (2005). A method for the in vitro  
637 reconstitution of a defined “30nm” chromatin fibre containing stoichiometric amounts of  
638 the linker histone. *Journal of molecular biology* 345, 957-968.

639 Jenuwein, T., and Allis, C.D. (2001). Translating the histone code. *Science* 293, 1074-  
640 1080.



- 641 Kimanius, D., Forsberg, B.O., Scheres, S.H., and Lindahl, E. (2016). Accelerated cryo-  
642 EM structure determination with parallelisation using GPUs in RELION-2. *Elife* 5.
- 643 Kubik, S., Bruzzone, M.J., Jacquet, P., Falcone, J.L., Rougemont, J., and Shore, D.  
644 (2015). Nucleosome Stability Distinguishes Two Different Promoter Types at All Protein-  
645 Coding Genes in Yeast. *Molecular cell* 60, 422-434.
- 646 Lee, W., Tillo, D., Bray, N., Morse, R.H., Davis, R.W., Hughes, T.R., and Nislow, C.  
647 (2007). A high-resolution atlas of nucleosome occupancy in yeast. *Nat Genet* 39, 1235-  
648 1244.
- 649 Lowary, P.T., and Widom, J. (1989). Higher-order structure of *Saccharomyces*  
650 *cerevisiae* chromatin. *Proc Natl Acad Sci U S A* 86, 8266-8270.
- 651 Luger, K., Mader, A.W., Richmond, R.K., Sargent, D.F., and Richmond, T.J. (1997a).  
652 Crystal structure of the nucleosome core particle at 2.8 Å resolution. *Nature* 389, 251-  
653 260.
- 654 Luger, K., Rechsteiner, T.J., Flaus, A.J., Wayne, M.M., and Richmond, T.J. (1997b).  
655 Characterization of nucleosome core particles containing histone proteins made in  
656 bacteria. *Journal of molecular biology* 272, 301-311.
- 657 Maeshima, K., Rogge, R., Tamura, S., Joti, Y., Hikima, T., Szerlong, H., Krause, C.,  
658 Herman, J., Seidel, E., DeLuca, J., *et al.* (2016). Nucleosomal arrays self-assemble into

- 659 supramolecular globular structures lacking 30-nm fibers. *The EMBO journal* 35, 1115-  
660 1132.
- 661 Mastronarde, D.N. (1997). Dual-axis tomography: an approach with alignment methods  
662 that preserve resolution. *Journal of structural biology* 120, 343-352.
- 663 Mavrich, T.N., Jiang, C., Ioshikhes, I.P., Li, X., Venters, B.J., Zanton, S.J., Tomsho,  
664 L.P., Qi, J., Glaser, R.L., Schuster, S.C., *et al.* (2008). Nucleosome organization in the  
665 *Drosophila* genome. *Nature* 453, 358-362.
- 666 McBryant, S.J., Adams, V.H., and Hansen, J.C. (2006). Chromatin architectural  
667 proteins. *Chromosome Res* 14, 39-51.
- 668 McDowell, A.W., Smith, J.M., and Dubochet, J. (1986). Cryo-electron microscopy of  
669 vitrified chromosomes in situ. *The EMBO journal* 5, 1395-1402.
- 670 Nathan, D., and Crothers, D.M. (2002). Bending and flexibility of methylated and  
671 unmethylated EcoRI DNA. *Journal of molecular biology* 316, 7-17.
- 672 Nishino, Y., Eltsov, M., Joti, Y., Ito, K., Takata, H., Takahashi, Y., Hihara, S., Frangakis,  
673 A.S., Imamoto, N., Ishikawa, T., *et al.* (2012). Human mitotic chromosomes consist  
674 predominantly of irregularly folded nucleosome fibres without a 30-nm chromatin  
675 structure. *The EMBO journal* 31, 1644-1653.

676 Olins, A.L., and Olins, D.E. (1974). Spheroid chromatin units (v bodies). *Science* *183*,  
677 330-332.

678 Perales, R., Zhang, L., and Bentley, D. (2011). Histone occupancy in vivo at the 601  
679 nucleosome binding element is determined by transcriptional history. *Mol Cell Biol* *31*,  
680 3485-3496.

681 Pettersen, E.F., Goddard, T.D., Huang, C.C., Couch, G.S., Greenblatt, D.M., Meng,  
682 E.C., and Ferrin, T.E. (2004). UCSF Chimera--a visualization system for exploratory  
683 research and analysis. *Journal of computational chemistry* *25*, 1605-1612.

684 Robinson, P.J., Fairall, L., Huynh, V.A., and Rhodes, D. (2006). EM measurements  
685 define the dimensions of the “30-nm” chromatin fiber: evidence for a compact,  
686 interdigitated structure. *Proceedings of the National Academy of Sciences* *103*, 6506-  
687 6511.

688 Routh, A., Sandin, S., and Rhodes, D. (2008). Nucleosome repeat length and linker  
689 histone stoichiometry determine chromatin fiber structure. *Proc Natl Acad Sci U S A*  
690 *105*, 8872-8877.

691 Schalch, T., Duda, S., Sargent, D.F., and Richmond, T.J. (2005). X-ray structure of a  
692 tetranucleosome and its implications for the chromatin fibre. *Nature* *436*, 138-141.

- 693 Scheffer, M.P., Eltsov, M., Bednar, J., and Frangakis, A.S. (2012). Nucleosomes  
694 stacked with aligned dyad axes are found in native compact chromatin in vitro. *Journal*  
695 *of structural biology* *178*, 207-214.
- 696 Scheffer, M.P., Eltsov, M., and Frangakis, A.S. (2011). Evidence for short-range helical  
697 order in the 30-nm chromatin fibers of erythrocyte nuclei. *Proceedings of the National*  
698 *Academy of Sciences* *108*, 16992-16997.
- 699 Scheres, S.H. (2012a). A Bayesian view on cryo-EM structure determination. *Journal of*  
700 *molecular biology* *415*, 406-418.
- 701 Scheres, S.H. (2012b). RELION: implementation of a Bayesian approach to cryo-EM  
702 structure determination. *Journal of structural biology* *180*, 519-530.
- 703 Shimamoto, Y., Tamura, S., Masumoto, H., and Maeshima, K. (2017). Nucleosome-  
704 nucleosome interactions via histone tails and linker DNA regulate nuclear rigidity. *Mol*  
705 *Biol Cell*.
- 706 Shivaswamy, S., Bhinge, A., Zhao, Y., Jones, S., Hirst, M., and Iyer, V.R. (2008).  
707 Dynamic remodeling of individual nucleosomes across a eukaryotic genome in  
708 response to transcriptional perturbation. *PLoS Biol* *6*, e65.

- 709 Song, F., Chen, P., Sun, D., Wang, M., Dong, L., Liang, D., Xu, R.-M., Zhu, P., and Li,  
710 G. (2014). Cryo-EM study of the chromatin fiber reveals a double helix twisted by  
711 tetranucleosomal units. *Science* 344, 376-380.
- 712 Tang, G., Peng, L., Baldwin, P.R., Mann, D.S., Jiang, W., Rees, I., and Ludtke, S.J.  
713 (2007). EMAN2: an extensible image processing suite for electron microscopy. *Journal*  
714 *of structural biology* 157, 38-46.
- 715 Thoma, F., and Koller, T. (1977). Influence of histone H1 on chromatin structure. *Cell*  
716 12, 101-107.
- 717 Thomas, J.O., and Furber, V. (1976). Yeast chromatin structure. *FEBS Lett* 66, 274-  
718 280.
- 719 Tivol, W.F., Briegel, A., and Jensen, G.J. (2008). An improved cryogen for plunge  
720 freezing. *Microscopy and microanalysis : the official journal of Microscopy Society of*  
721 *America, Microbeam Analysis Society, Microscopical Society of Canada* 14, 375-379.
- 722 Tse, C., Sera, T., Wolffe, A.P., and Hansen, J.C. (1998). Disruption of higher-order  
723 folding by core histone acetylation dramatically enhances transcription of nucleosomal  
724 arrays by RNA polymerase III. *Mol Cell Biol* 18, 4629-4638.
- 725 van Holde, K., and Zlatanova, J. (1995). Chromatin higher order structure: chasing a  
726 mirage? *The Journal of biological chemistry* 270, 8373-8376.

- 727 Waterborg, J.H. (2000). Steady-state levels of histone acetylation in *Saccharomyces*  
728 *cerevisiae*. *The Journal of biological chemistry* 275, 13007-13011.
- 729 Widom, J. (1986). Physicochemical studies of the folding of the 100 A nucleosome  
730 filament into the 300 A filament. Cation dependence. *Journal of molecular biology* 190,  
731 411-424.
- 732 Woodcock, C.L. (1994). Chromatin fibers observed in situ in frozen hydrated sections.  
733 Native fiber diameter is not correlated with nucleosome repeat length. *The Journal of*  
734 *Cell Biology* 125, 11-19.
- 735 Woodcock, C.L., Frado, L.L., and Rattner, J.B. (1984). The higher-order structure of  
736 chromatin: evidence for a helical ribbon arrangement. *J Cell Biol* 99, 42-52.
- 737 Yao, J., Lowary, P.T., and Widom, J. (1990). Direct detection of linker DNA bending in  
738 defined-length oligomers of chromatin. *Proc Natl Acad Sci U S A* 87, 7603-7607.
- 739 Yuan, G.C., Liu, Y.J., Dion, M.F., Slack, M.D., Wu, L.F., Altschuler, S.J., and Rando,  
740 O.J. (2005). Genome-scale identification of nucleosome positions in *S. cerevisiae*.  
741 *Science* 309, 626-630.
- 742

743 **LIST OF FIGURES**

|      |                                                        |
|------|--------------------------------------------------------|
| 1A   | Schematic of chromatin states                          |
| 1B   | Cartoon of cell lysis scheme                           |
| 1C   | Intact Ot                                              |
| 1D   | Lysed Ot                                               |
| 2A   | Ot lysed, 1 mM Mg <sup>2+</sup>                        |
| 2B   | Ot lysed, 0 Mg <sup>2+</sup>                           |
| 2C   | Ot lysed, 5 mM EDTA                                    |
| 2D-G | Enlarged, cropped nucleosomes, fibers, masses          |
| 3A   | Sc 0mM EDTA                                            |
| 3B   | Sc 50 mM EDTA                                          |
| 3C,D | Enlargements of A+B fibers, 4-fold                     |
| 4A,B | Sc -/+TSA                                              |
| 4C,D | Enlargement of ncps in B, 4-fold                       |
| 4E,F | Enlargement of naked DNA in B, 4-fold                  |
| 4G   | Beeswarm plot of naked DNA in B                        |
| 4H,I | NND and 10th NND of ncps in A, B, and <i>in vivo</i>   |
| 5A,B | Sc face-to-face and zigzags                            |
| 5C   | Sc 2D classes                                          |
| 5D   | Sc 30-nm fibers                                        |
| 5E   | Beeswarm plots of nucleosomes/11nm and fiber diameters |
| 6A   | Gallery of ncp 3-D classes                             |
| 6B   | Ot 5 mM EDTA, slicer                                   |
| 6C   | Ot synthetic tomogram                                  |
| 7A   | Gallery of ncp 3-D classes                             |
| 7B,C | Enlargements of D,E                                    |
| 7D   | Sc 50 mM EDTA, slicer                                  |
| 7F   | Sc synthetic tomogram                                  |
| 8    | Cartoon of nucleosome packing                          |

744

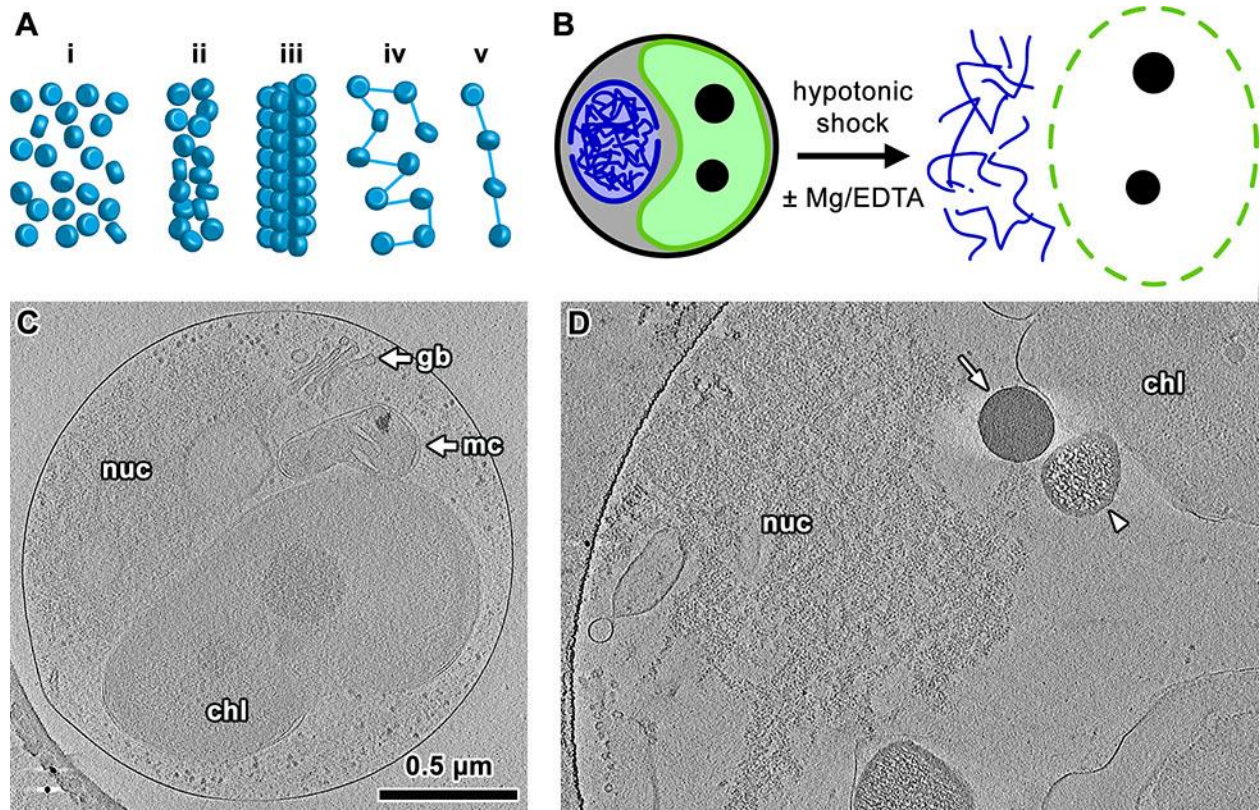

### Figure 1. Strategy for 3-D analysis of natural chromatin

(A) Possible nucleosome (blue discs) arrangements, including (i) chromatin masses, (ii) irregular 30-nm fibers, (iii) regular 30-nm fibers, (iv) open zigzags, (v) beads on a string. Blue lines: linker DNA, depicted based on experimental observations. (B) The plasma membrane is ruptured by hypotonic shock, exposing the cellular contents to the final ionic conditions (with or without  $Mg^{2+}$  or EDTA added). The chloroplast (green) and nucleus (blue structure) are the two largest organelles in picoplankton. The dashed lines indicate the disruption of the plasma (black), chloroplast (green), and nuclear (blue) membranes. (C) Tomographic slice (30 nm) showing an intact early-interphase picoplankton cell. The largest organelles are labelled: chloroplast (chl); nucleus (nuc); Golgi body (gb); mitochondrion (mc). The lower left corner shows the curved edge of the carbon support and two gold fiducials (dark puncta). Note that as previously observed,



758 the nucleus is frequently found without an intact nuclear envelope even in interphase.  
759 (D) Tomographic slice (30 nm) of a lysed picoplankton cell in 1 mM  $Mg^{2+}$ , at the same  
760 scale as panel C. The arrow points to the radiation-tolerant granule from the chloroplast  
761 and the arrowhead shows the chloroplast-derived granule that is sensitive to electron  
762 beam damage. The remnants of the nucleus (nuc) and chloroplast (chl) are labelled.  
763 The lysed cell is flattened by surface tension (after blotting), causing all components  
764 components to spread out. This spreading allows the ice to be much thinner resulting in  
765 higher image contrast than an intact cell.

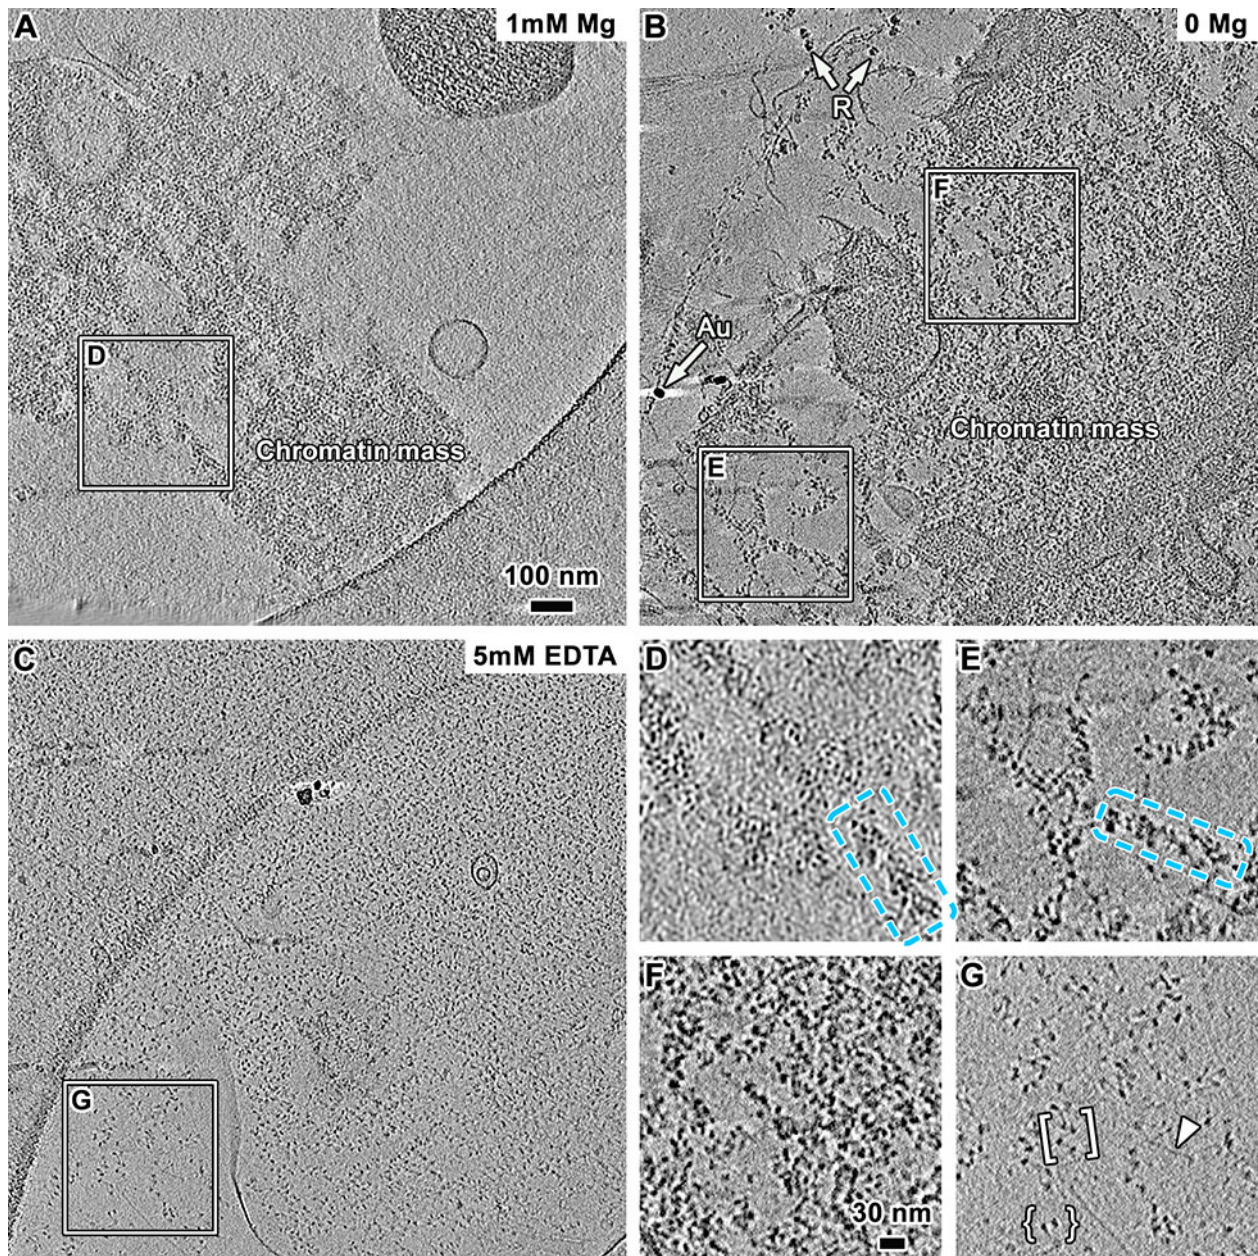

766

767 **Figure 2. Picoplankton chromatin can form masses and irregular 30-nm fibers in**  
768 **the presence of divalent cations**

769 Tomographic slices (30 nm) of picoplankton cell lysates in buffer supplemented with (A)  
770 1 mM Mg<sup>2+</sup>, (B) no additional divalent cations, and (C) 5 mM EDTA. The dense round  
771 structures are gold fiducials (Au in panel B); the gently curved structures in A and C are  
772 from the edges of the carbon support film. A couple of ribosomes (R) are indicated with

773 arrows in (B). Positions boxed in A - C are enlarged 2-fold, showing irregular 30-nm  
774 fibers (D-F), open zigzags (G, bracket), and a couple of nucleosomes (G, curly  
775 brackets). A long stretch of naked DNA is indicated with an arrowhead in panel G. More  
776 examples of chromatin subjected to each condition are shown in Figs S2 - S4.

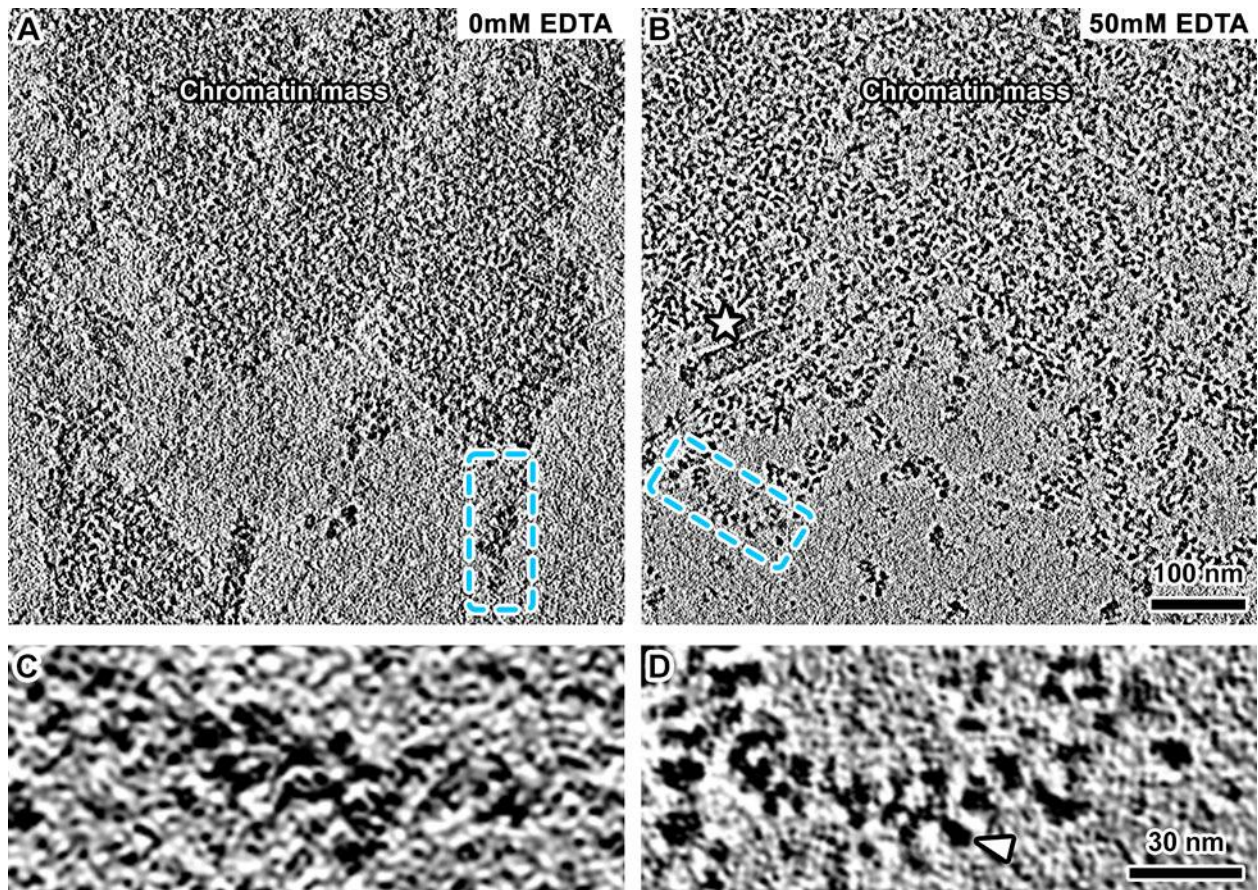

777

778 **Fig. 3. Yeast chromatin forms masses and irregular 30-nm fibers even in the**  
779 **absence of divalent cations**

780 (A) Tomographic slices (30 nm) of yeast nuclei lysate without EDTA. (B) Tomographic  
781 slices (30 nm) of yeast nuclei lysate with 50 mM EDTA. Star: microtubule. (C)  
782 Enlargement (4-fold) of 30-nm fiber boxed in panel A. (D) Enlargement (4-fold) of an  
783 irregular 30-nm fiber in 50 mM EDTA. Arrowhead: nucleosome.

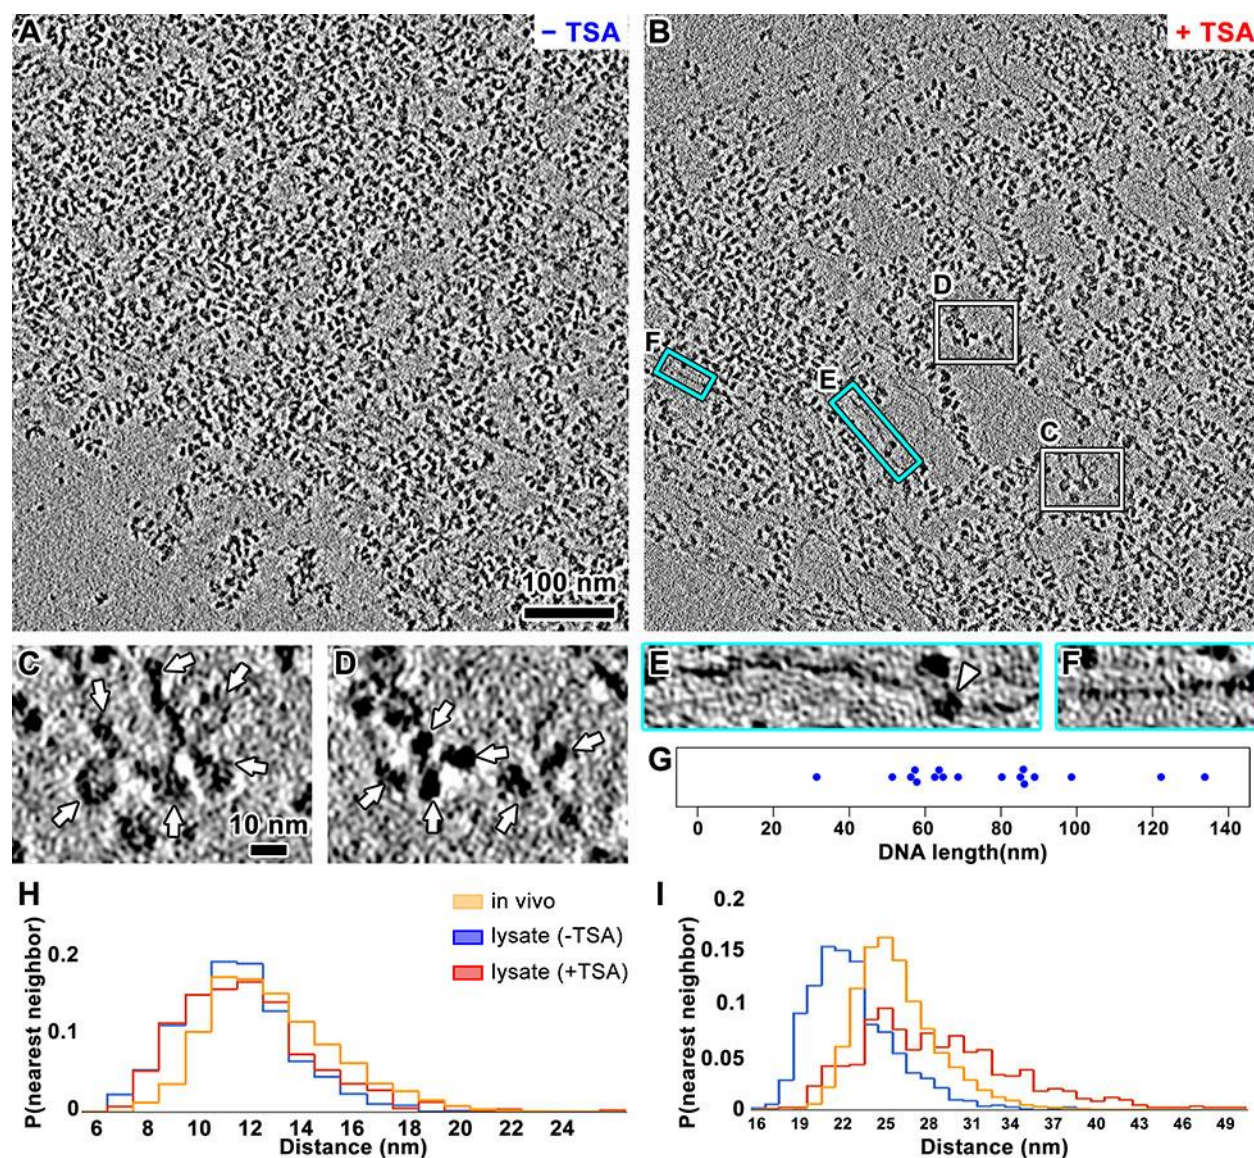

784

785 **Figure 4. Inhibition of histone deacetylase partially disperses yeast chromatin**

786 (A) Tomographic slice (10 nm) of yeast nuclei lysed in buffer with 50 mM EDTA. (B)

787 Tomographic slice (10 nm) of yeast nuclei lysed in buffer with 50 mM EDTA and 82 μM

788 TSA. (C and D) Four-fold enlargements of positions boxed in white in panel B, showing

789 open zigzags. Arrows: nucleosomes. (E and F) Four-fold enlargements of positions

790 boxed in cyan in panel B, rotated counter clockwise. The naked DNA is 110 nm long in

791 panel E and 55 nm long in panel F. Arrowhead: a non-nucleosome density. (G)

792 Distribution of naked DNA length in tomograms of (B). (H and I) Histograms of nearest-  
793 and tenth nearest-neighbor distances, respectively. The *in vivo* measurements were  
794 done using a cryotomogram of sectioned yeast we previously reported (Chen et al.,  
795 2016).

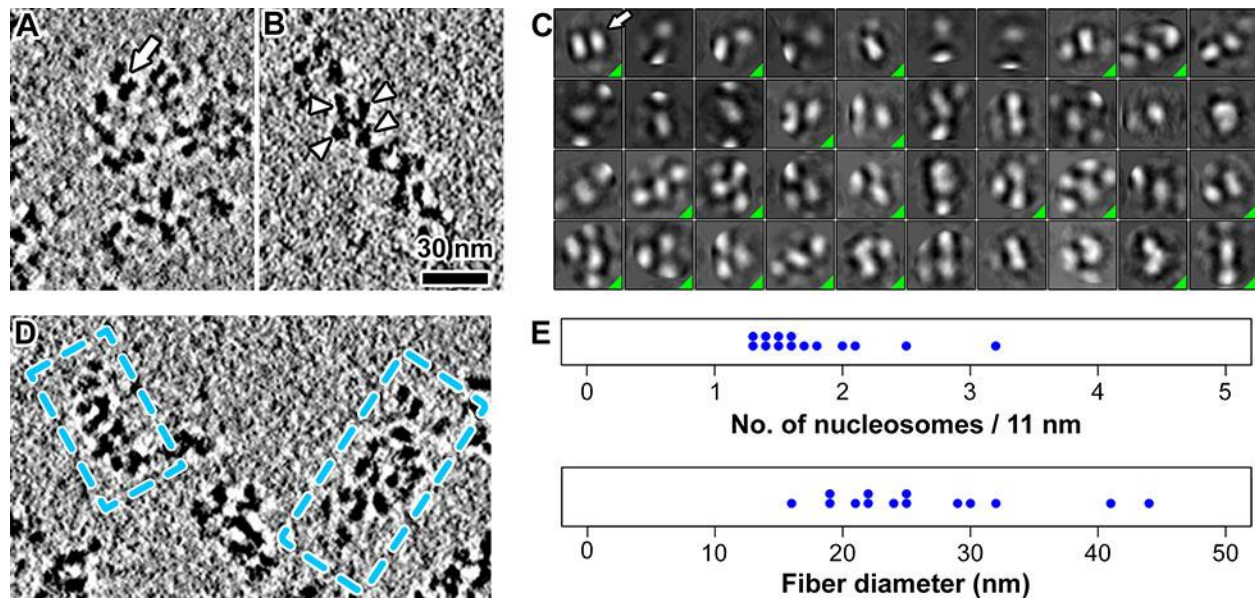

796

797 **Figure 5. Natural chromatin adopts few regular packing motifs**

798 (A) Tomographic slice (10 nm) of yeast chromatin showing face-to-face packing (arrow).

799 (B) Tomographic slice (6 nm) of yeast chromatin showing zigzag motif. Arrowheads:

800 nucleosomes. (C) Two-dimensional classification of yeast lysate in 50 mM EDTA,

801 ordered left-to-right, top-to-bottom from the most abundant to least abundant. Classes

802 that represent actual nucleosome-nucleosome interactions have a green triangle in the

803 lower-right corner. The contrast is inverted relative to the raw tomograms. Arrow: a

804 class showing face-to-face packing. (D) Tomographic slice (10 nm) of yeast chromatin

805 showing irregular 30-nm fibers. (E) Measurement of fiber compaction parameters.

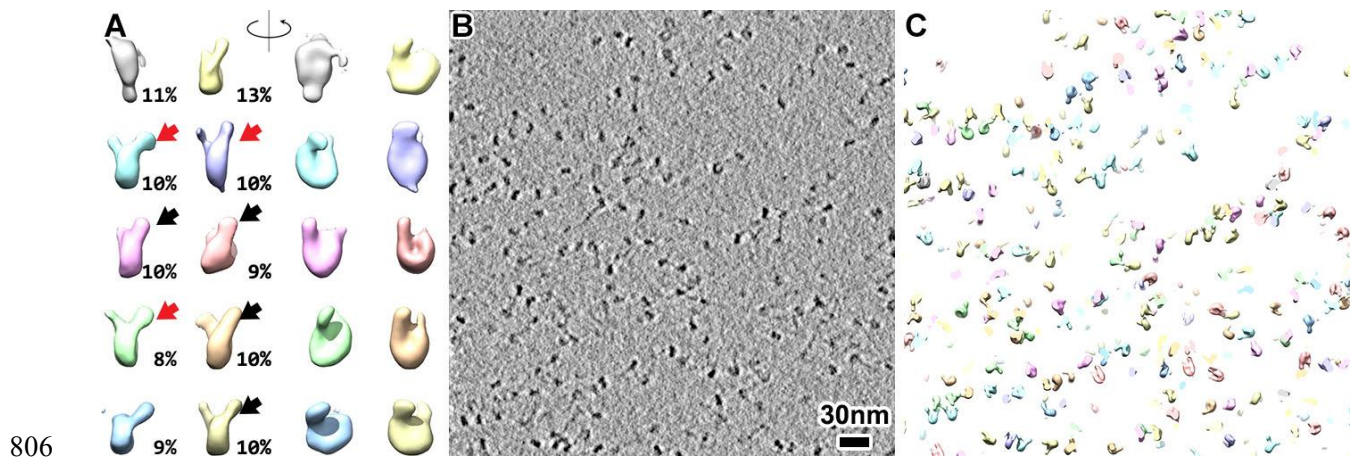

806

807 **Figure 6. Open zigzag chromatin accommodates open linker DNA**

808 Gallery of nucleosome classes viewed (left) edge on and (right) face on, contoured at  
809  $0.5\sigma$  to better visualize the linker DNA. The percentage of particles belonging is shown  
810 in black numbers at the lower right of each respective class. Black arrows: classes with  
811 open linker DNA. Red arrows: classes with crossed linker DNA. Notice that the yellow  
812 and blue class only show the density of one linker DNA. (B) Tomographic slice (30 nm)  
813 of picoplankton chromatin in lysis buffer with 5 mM EDTA. (C) Three-dimensional  
814 classes of template-matched nucleosomes, remapped as a synthetic tomogram.



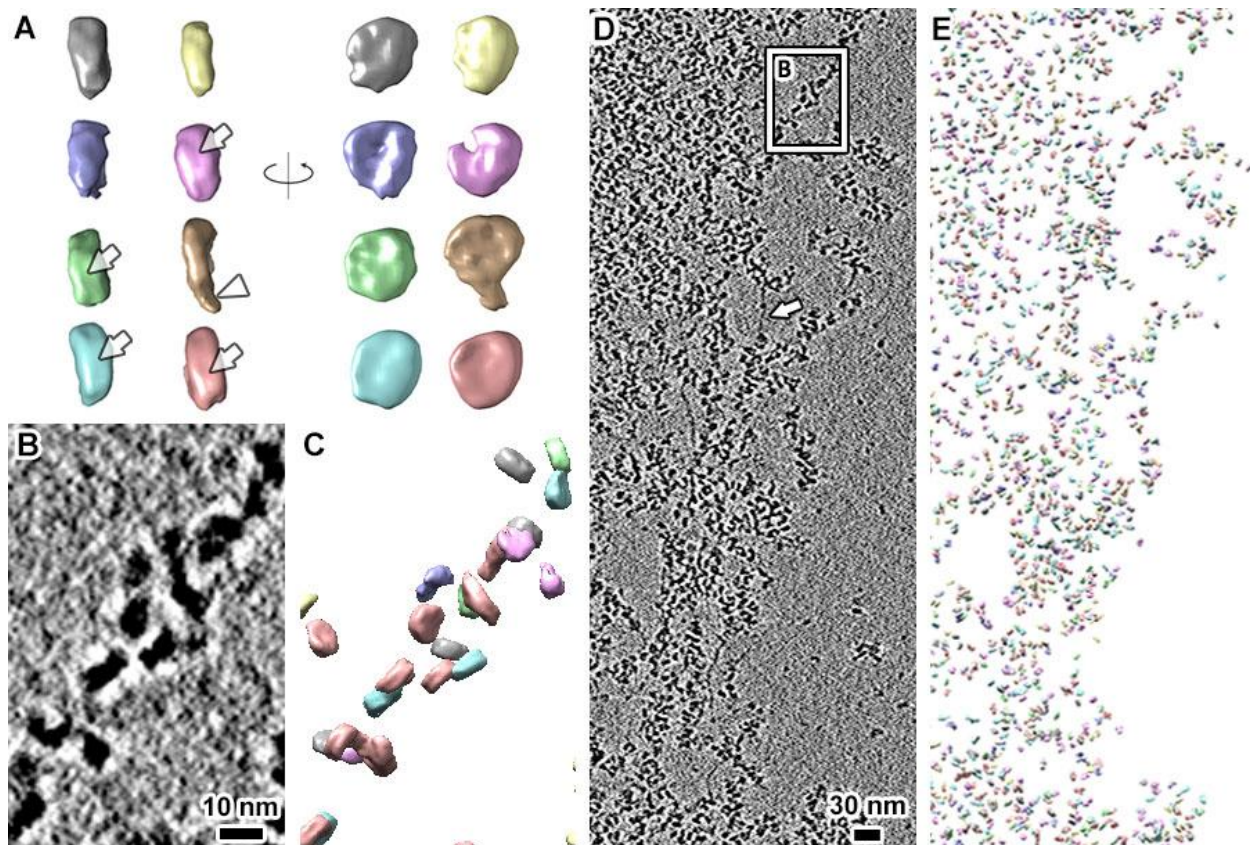

815

816 **Figure 7. Synthetic tomogram reveals the conformational and configurational**  
817 **heterogeneity of yeast chromatin**

818 (A) Gallery of 3-D classes viewed (left) edge on and (right) face on. Arrows: DNA gyres.  
819 Arrowhead: DNA stem-like structure. Note these nucleosome classes are not color  
820 coded the same way as in Fig. 4. (B) Five-fold enlargement of an irregular 30-nm fiber  
821 boxed in panel D. (C) synthetic tomogram of a 78-nm thick tomogram (same X-Y  
822 position as panel C). Arrow: a long stretch of naked DNA. (D) Tomographic slice (10  
823 nm) of yeast nuclei lysed in the presence of 50 mM EDTA. (E) Synthetic tomogram of  
824 the same position as panel D).

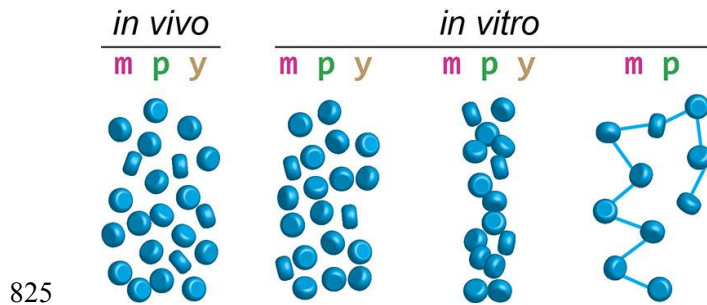

826 **Figure 8. Chromatin structure is highly variable *in vitro***

827 Nucleosome (blue disc) packing in (m) metazoans, (p) picoplankton, and (y) yeast. *In*

828 *vivo*, cryo-ET data is most consistent with a chromatin mass. *In vitro*, (left) masses,

829 (middle) irregular 30-nm fibers, and (right) open zigzags have been seen in all three

830 classes of organisms but very rarely in yeast. Linker DNA (blue lines) is depicted only in

831 structures in which it has been observed.
